# Supplementary material for: Facile preparation of semimetallic WP2 as a novel photocatalyst with high photoactivity
Source: Royal Society of Chemistry journal article supplement (doi:10.1039/c5ra26269k), 2016-01-01
Supplement: c5ra26269k1.pdf [file c5ra26269k1.pdf]

Supporting information for

## Facile Preparation of Semimetallic $WP_2$ as a Novel Photocatalyst with high photoactivity

Mingyu Pi, Tianli Wu, Dingke Zhang, Shijian Chen \*, and Shuxia Wang

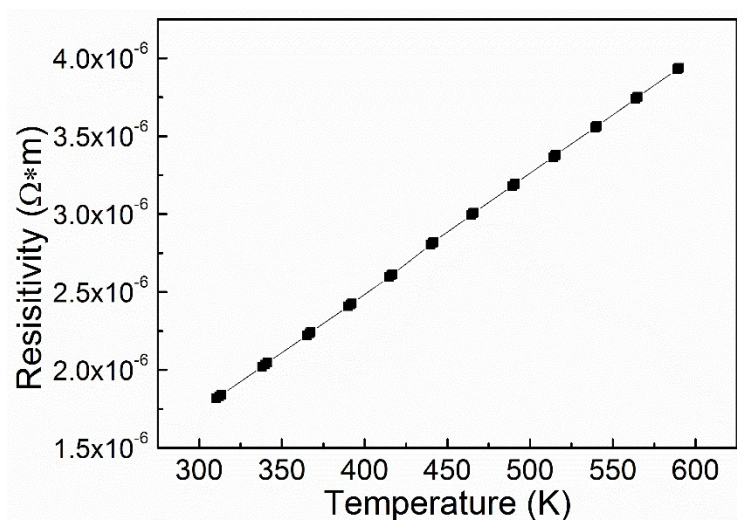

Figure S1. Temperature dependence electrical resistivity for  $WP_2$

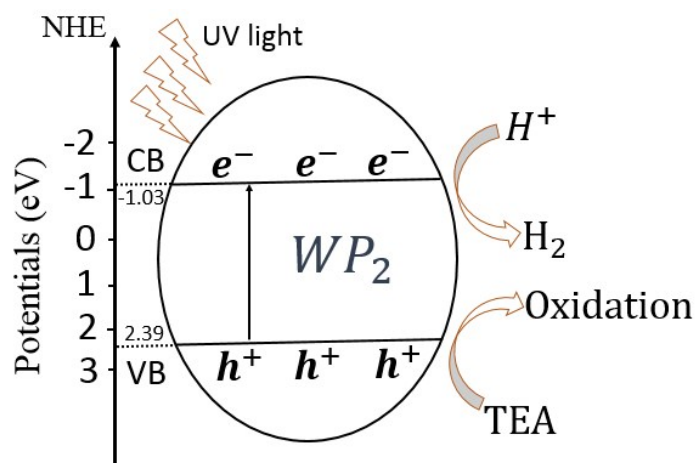

Figure S2. The mechanism of hydrogen evolution of  $WP_2$
